# Supplementary material for: Direct CO2capture and conversion to fuels on magnesium nanoparticles under ambient conditions simply using water
Source: Royal Society of Chemistry journal article supplement (doi:10.1039/d1sc01113h), 2021-01-01
Supplement: d1sc01113h1.pdf [file d1sc01113h1.pdf]

## SUPPORTING INFORMATION

### **Direct CO<sub>2</sub> Capture and Conversion to Fuels on Magnesium Nanoparticles at Ambient Conditions Simply Using Water**

Sushma A. Rawool,<sup>1</sup> Rajesh Belgamwar,<sup>1</sup> Rajkumar Jana,<sup>2</sup> Ayan Maity,<sup>1</sup> Ankit Bhumla,<sup>1</sup> Nevzat Yigit,<sup>3</sup> Ayan Datta,<sup>2</sup> Günther Rupprechter,<sup>3</sup> Vivek Polshettiwar,<sup>1\*</sup>

<sup>1</sup>Department of Chemical Sciences, Tata Institute of Fundamental Research (TIFR), Mumbai, India.

<sup>2</sup>School of Chemical Sciences, Indian Association for the Cultivation of Science, Kolkata, India.

<sup>3</sup>Institute of Materials Chemistry, Technische Universität Wien, Getreidemarkt 9/BC/165, 1060, Vienna, Austria.

Email: [vivekpol@tifr.res.in](mailto:vivekpol@tifr.res.in), Phone: (91) 8452886556

**Detailed procedure for liquid product analysis by <sup>1</sup>H NMR spectroscopy:** The reaction was carried out in 5 ml of water and after completion of the reaction, the solution was recovered and centrifuged to separate the supernatant solution and solid residue. The supernatant aqueous solution was directly analyzed (for quantification, 0.5 mL of the supernatant solution and 60 μL of D<sub>2</sub>O was mixed) by <sup>1</sup>H NMR (using water suppression pulse sequence). Quantification was carried out using the standard calibration curve.

**Detailed procedure for gas product analysis by GC and GC-MS:** The online monitoring of the gaseous products during the reactions as carried out using Micro GC (Agilent Technologies 490 Micro GC) directly connected to the reactor, using thermal conductivity detector (TCD), molecular-sieve column and argon as carrier gas. The gaseous products of the labeled <sup>13</sup>CO<sub>2</sub> experiment were analyzed off-line by gas chromatograph equipped with TCD, flame ionization detector (FID) and mass spectrometer (MS) (Agilent 7890B, Agilent Technologies), Agilent hybrid column CP7430 and helium as carrier gas.

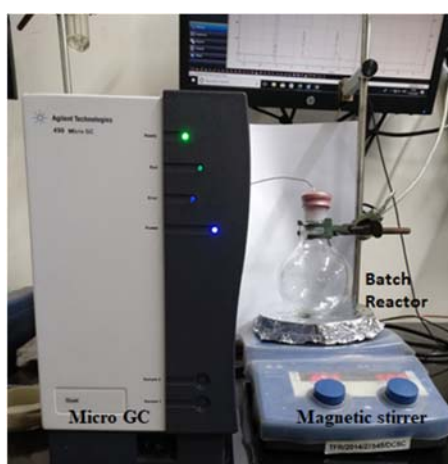

*Experimental setup for Mg-assisted CO<sub>2</sub> conversion. The gaseous product of the reaction was identified and quantified using online microGC, offline GCMS and liquid product by <sup>1</sup>H NMR.*

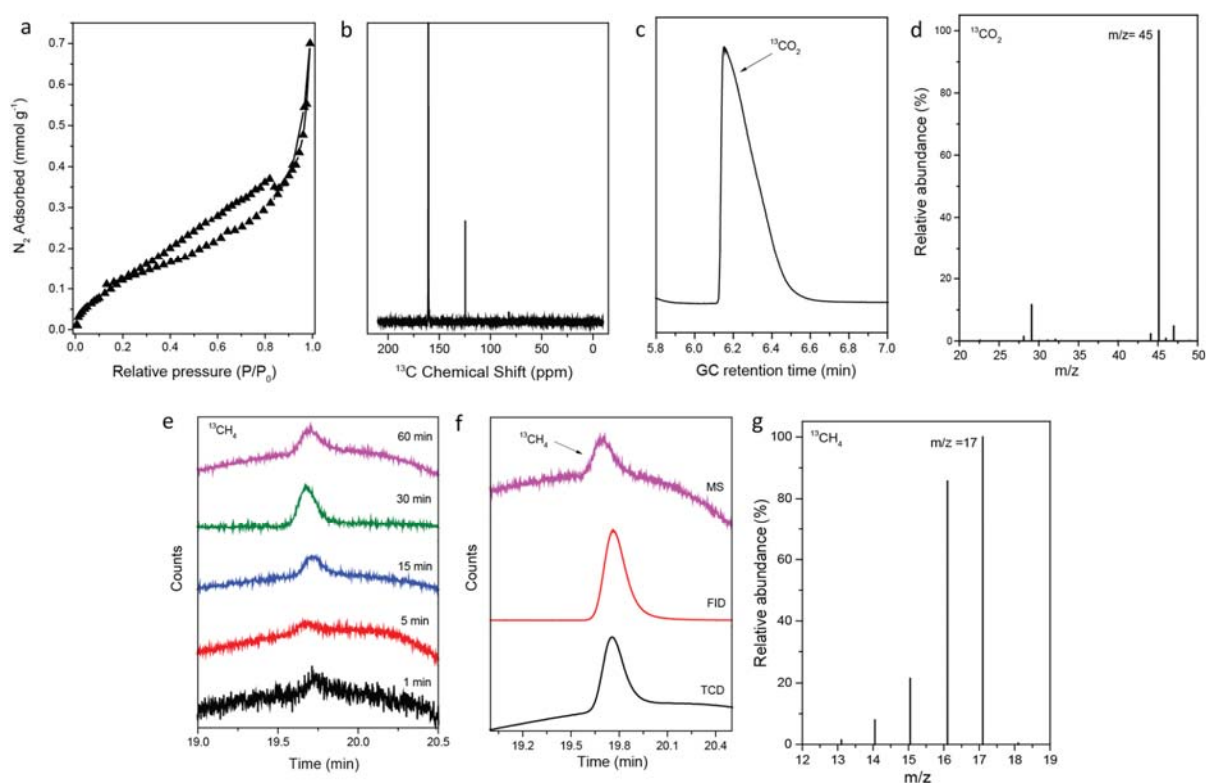

**Figure S1.** (a)  $N_2$  sorption isotherm of Mg NPs; (b)  $^{13}C$  NMR spectrum of the reaction mixture after 1 h of reaction using unlabeled  $CO_2$ , under exactly the same NMR pulse sequence and total number of scans (that of the  $^{13}CO_2$  experiment). (c) gas chromatogram of  $CO_2$  (peak of  $CO_2$  at retention time 6.2 min), (d) mass spectrum of  $^{13}CO_2$  ( $m/z = 45$ ) (e) GC-MS recorded (peak of methane at retention time 19.7 min) with increasing reaction time, (f) Gas chromatogram recorded at 60 min with thermal conductivity detector (TCD), flame ionization detector (FID) and mass spectrometer (MS), (g) MS spectrum of isotopic  $^{13}CH_4$  ( $m/z = 17$ ) obtained at 60 min. For this, 50 mg of Mg NPs was taken in a 50 ml round bottom flask, and then  $^{13}CO_2$  was purged through it for 1 min with a flow of 60 ml/min. The flask RB was evacuated and again  $^{13}CO_2$  was passed through it for 1 min. Then, 5 ml water were added and the reaction products were monitored at 0, 1, 5, 15, 30 and 60 min, using a GC coupled with a TCD, FID and MS. The mass spectrum of the product methane showed the formation of isotopically labelled  $^{13}CH_4$  ( $m/z = 17$ ) by reduction of  $^{13}CO_2$  gas.

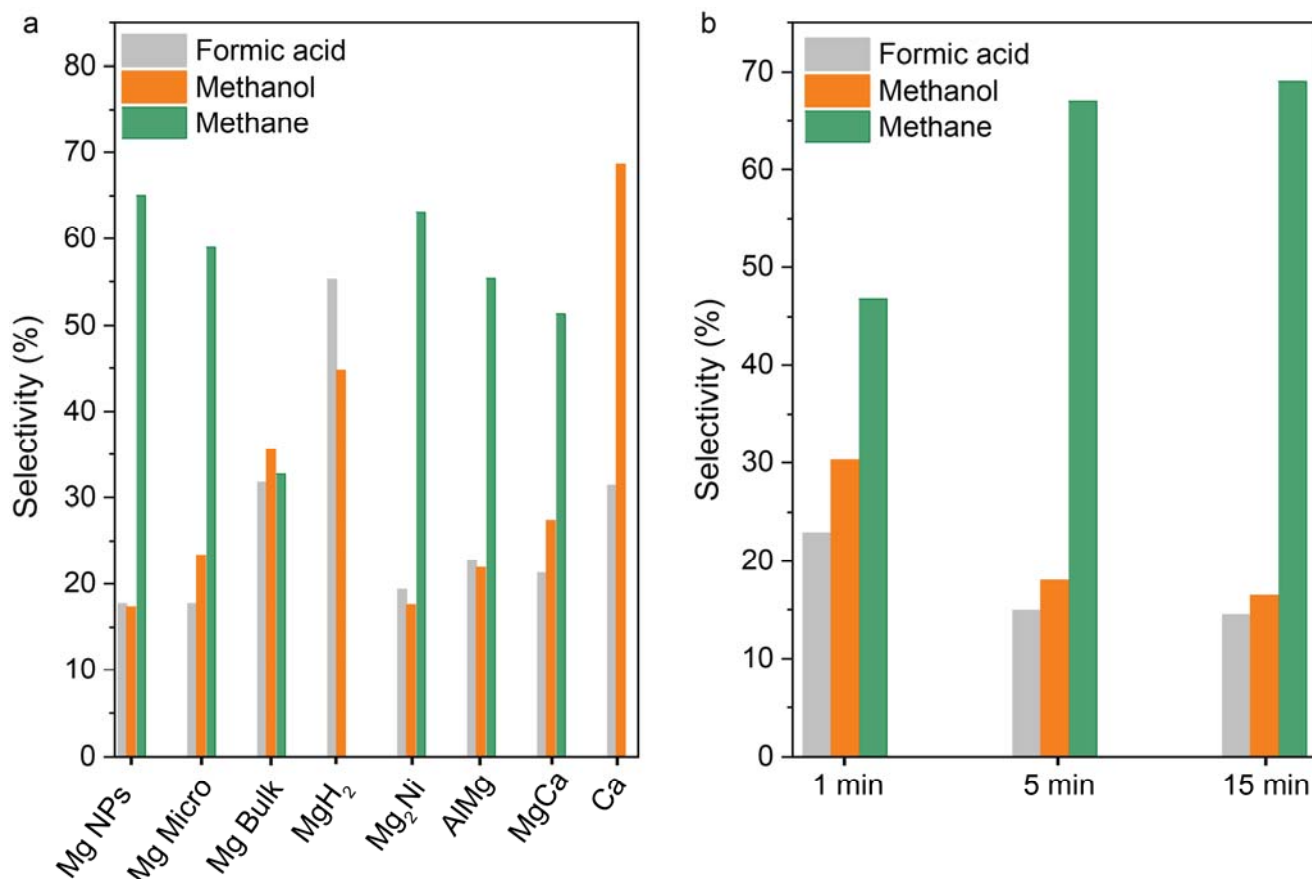

**Figure S2.** The selectivity of carbon-containing products (methanol, methane, and formic acid), using a) Mg and Mg alloy, b) Mg nanoparticles at various reaction time points, at room temperature and atmospheric pressure in water.

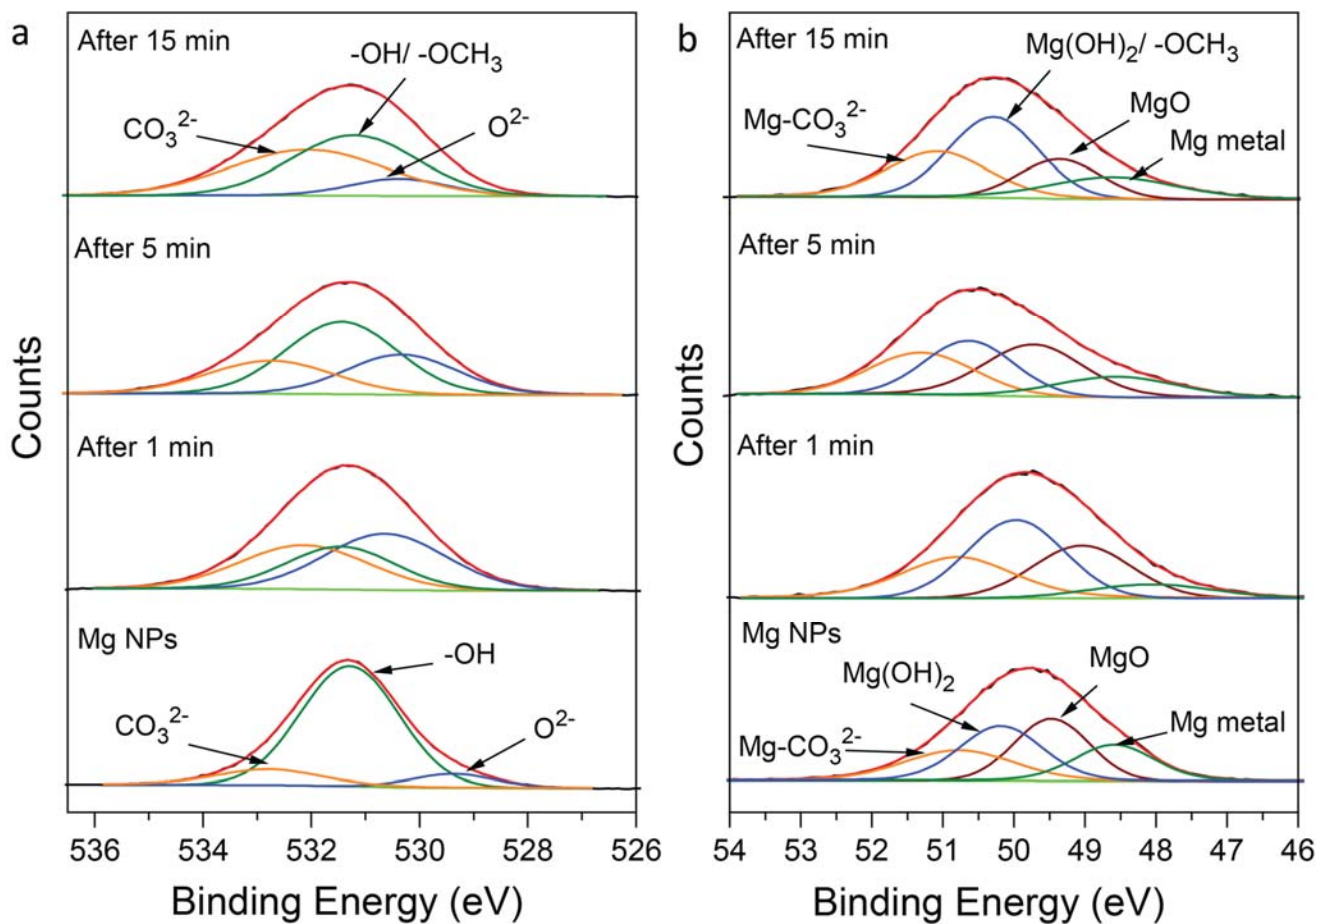

**Figure S3.** XPS spectra of (a) O 1s and (b) Mg 2p of Mg NPs and the solid product recovered after 1, 5 and 15 min of reaction time.

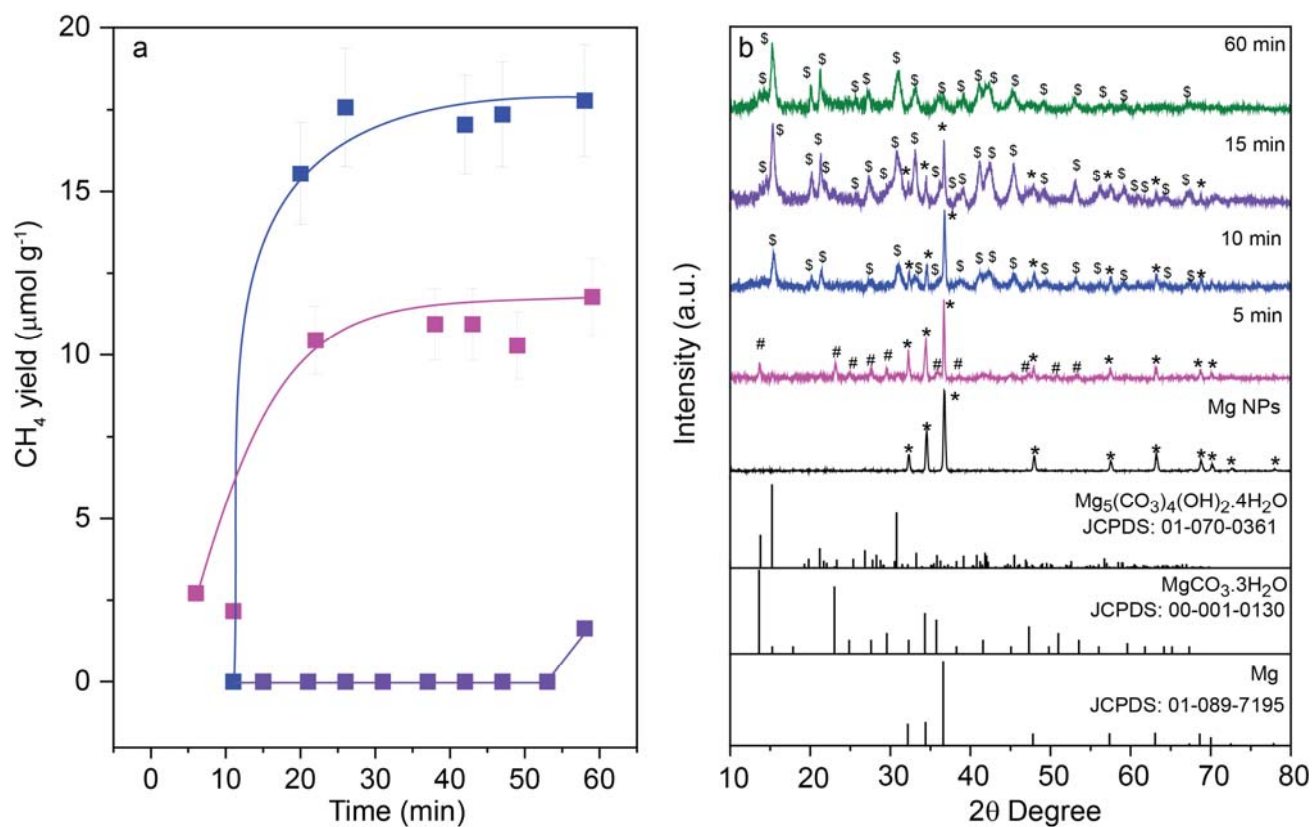

**Figure S4.** (a) Methane yield with reaction time from the reduction of CO<sub>2</sub> at room temperature and ambient pressure, using Mg NPs after initial products formed were flushed out after 5, 10, and 15 min of reaction. (b) PXRD patterns of the dried solid reaction mixture after 0, 5, 10, 15 and 60 min of reaction. Standard XRD patterns of Mg (JCPDS no.:01-089-7195), MgCO<sub>3</sub>·3H<sub>2</sub>O (JCPDS No.:00-001-0130) and Mg<sub>5</sub>(CO<sub>3</sub>)<sub>4</sub>(OH)<sub>2</sub>·4H<sub>2</sub>O (JCPDS No.:01-070-0361) are also shown. (\*Mg metal, #MgCO<sub>3</sub>·3H<sub>2</sub>O and §Mg<sub>5</sub>(CO<sub>3</sub>)<sub>4</sub>(OH)<sub>2</sub>·4H<sub>2</sub>O)

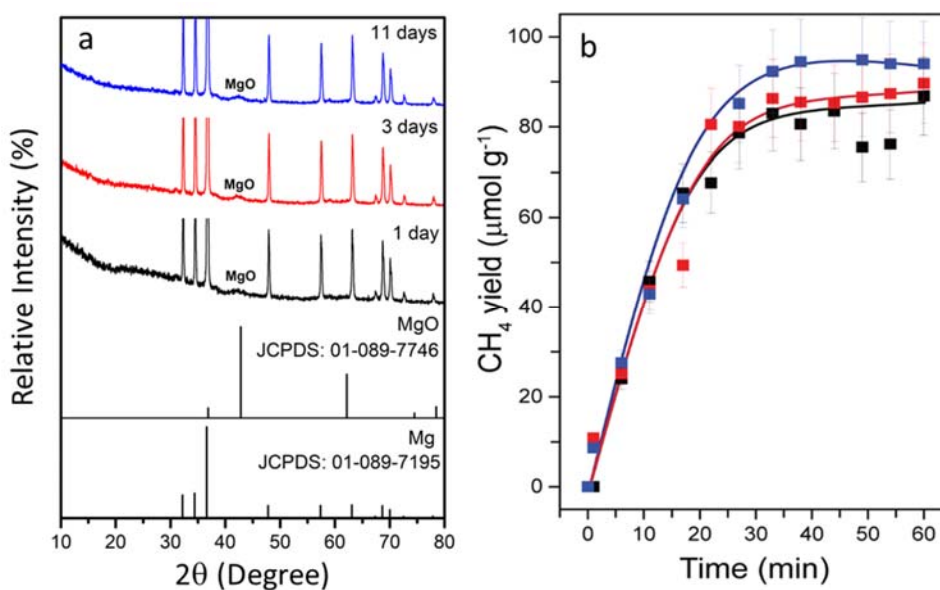

**Figure S5.** (a) PXRD pattern of Mg nanoparticles exposed to air 1, 3 and 11 days and standard patterns of Mg (JCPDS No.:01-089-7195) and MgO (JCPDS No.:01-089-7746), (b) methane yield with reaction time by reduction of  $\text{CO}_2$  using water at room temperature and atmospheric pressure, using magnesium nanoparticles, exposed to air for 1, 3 and 11 days. Black- 1 day, Red- 3 days, Blue- 11 days. A weak PXRD peak indicated a thin MgO shell.

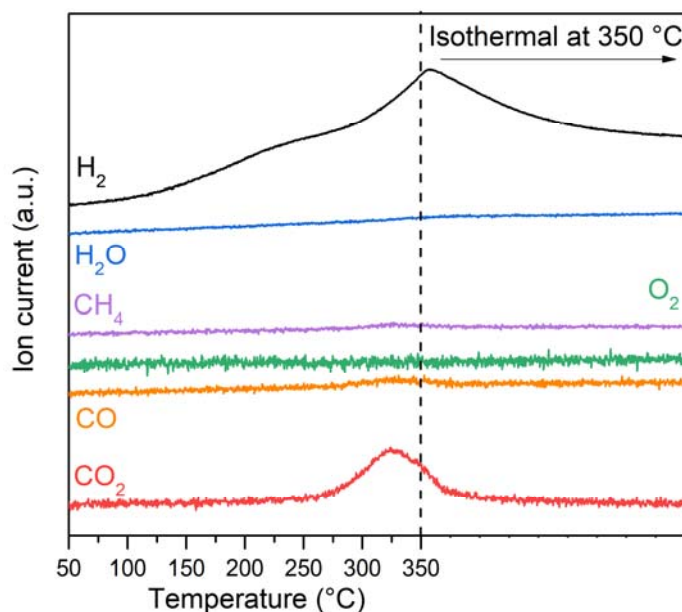

**Figure S6.** TPD-MS: To obtain clean surfaces, Mg NPs were pretreated at 350  $^{\circ}\text{C}$  in helium flow (heating rate 10  $^{\circ}\text{C}/\text{min}$ ) before in situ ATR-FTIR studies. TPD-MS profiles revealed desorption of hydrogen (150-350  $^{\circ}\text{C}$ ) and  $\text{CO}_2$  (250-350  $^{\circ}\text{C}$ ), resulting from the decomposition of bicarbonates on the Mg metal surface.



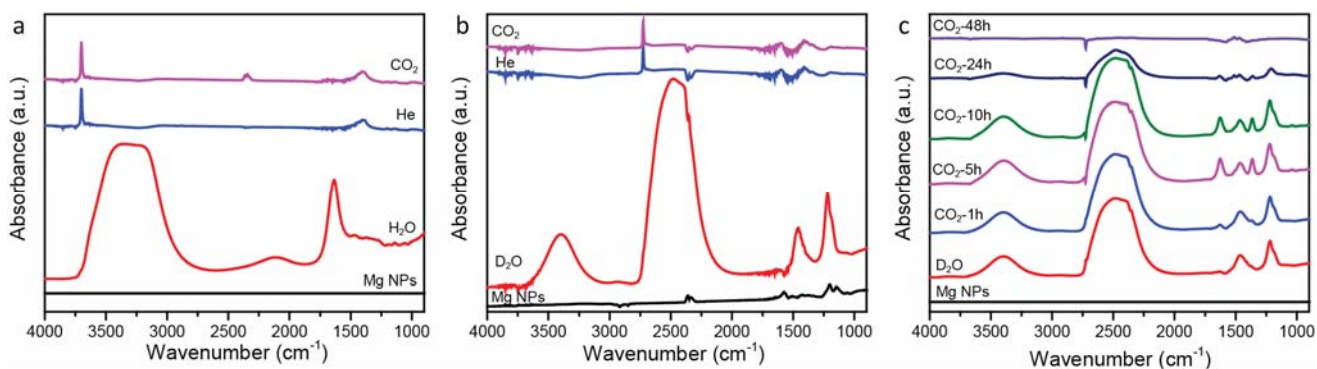

**Figure S7.** In situ ATR-FTIR spectra recorded (a) by adding (liquid) H<sub>2</sub>O to the Mg NPs and subsequently purging with He and CO<sub>2</sub> gas, (b) by replacing H<sub>2</sub>O with D<sub>2</sub>O and subsequently purging with He and CO<sub>2</sub> gas, (c) by adding D<sub>2</sub>O to the Mg NPs and then purging with CO<sub>2</sub> for 1, 5, 10, 24 and 48 h.

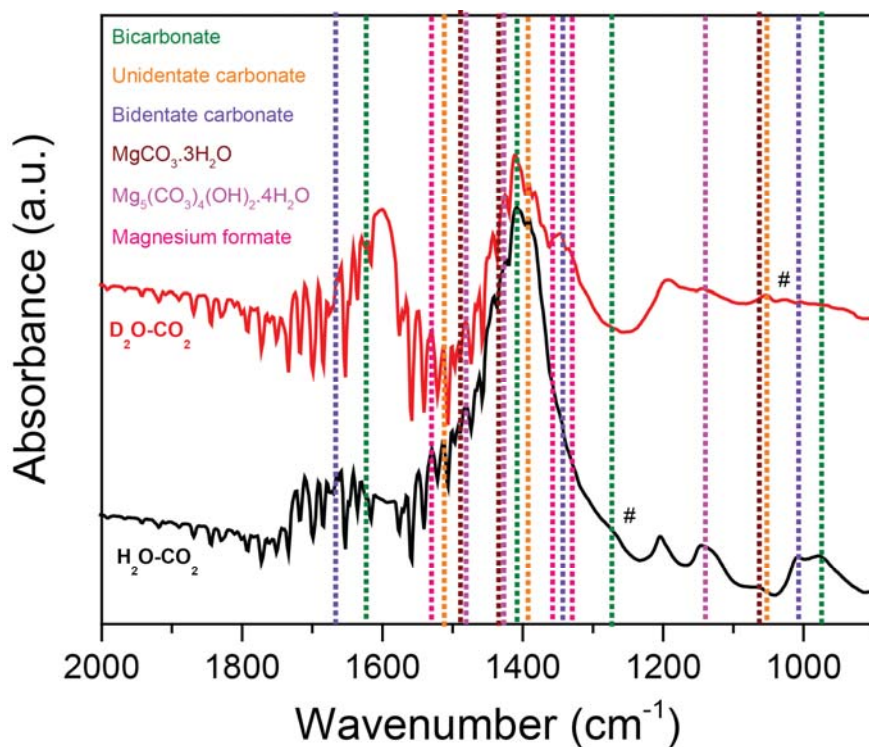

**Figure S8.** Comparison of ATR spectra recorded after passing CO<sub>2</sub> over Mg NPs treated with H<sub>2</sub>O and D<sub>2</sub>O, respectively. The absorption band at 1273 cm<sup>-1</sup> of the C-OH bending mode of bicarbonate appeared at lower frequency 1024 cm<sup>-1</sup> (marked as #).

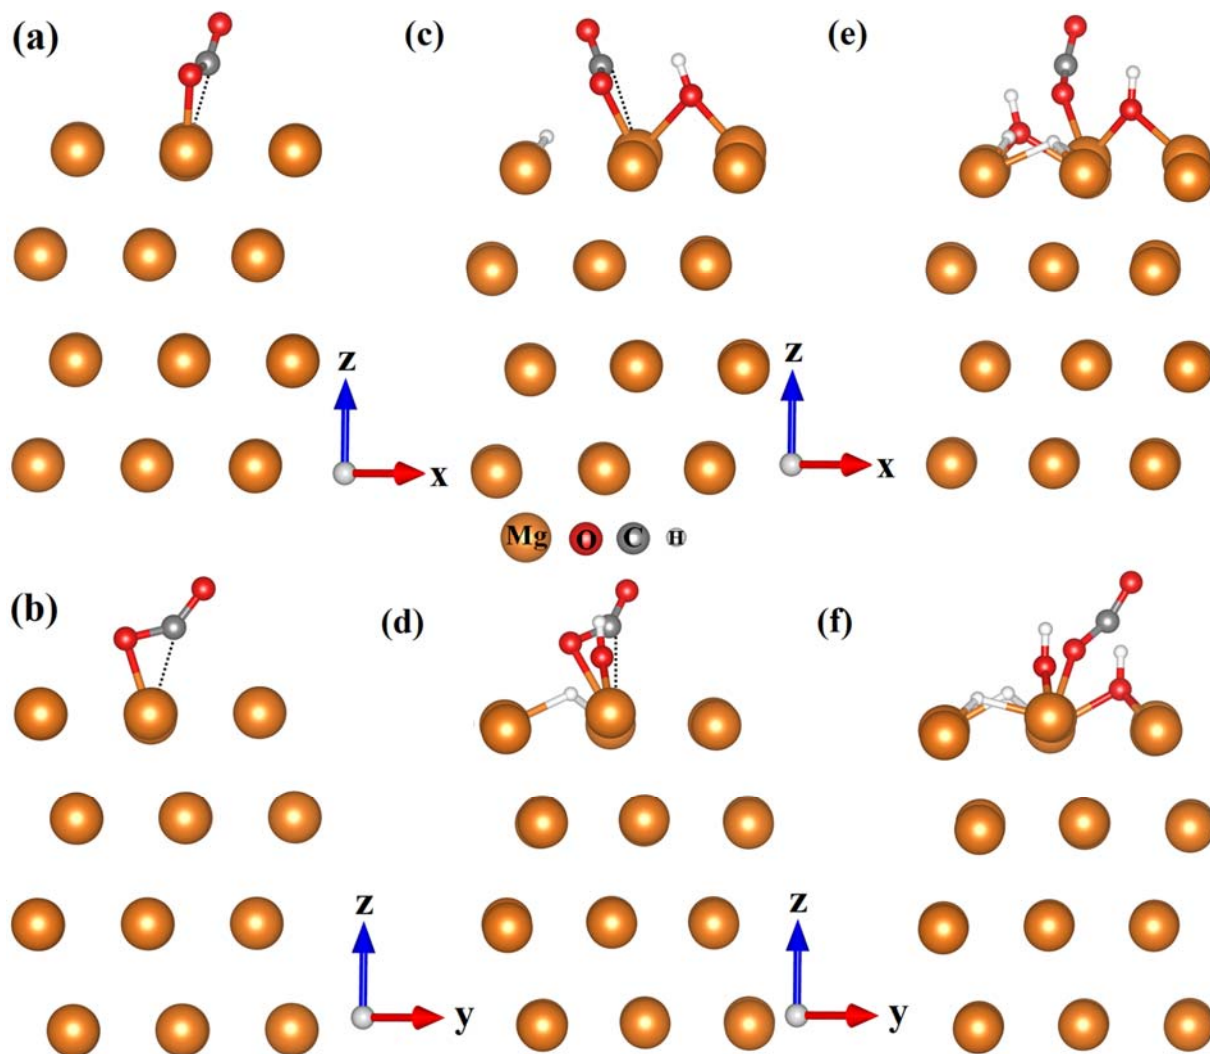

**Figure S9.** Different views of CO<sub>2</sub> adsorbed on the Mg surface: (a-b) adsorption on pristine Mg surface, (c-d) adsorption on hydrated Mg surface, (e-f) adsorption on Mg(OH)<sub>2</sub> surface (black dotted lines indicate weak interaction between carbon atom of CO<sub>2</sub> and surface Mg atom).



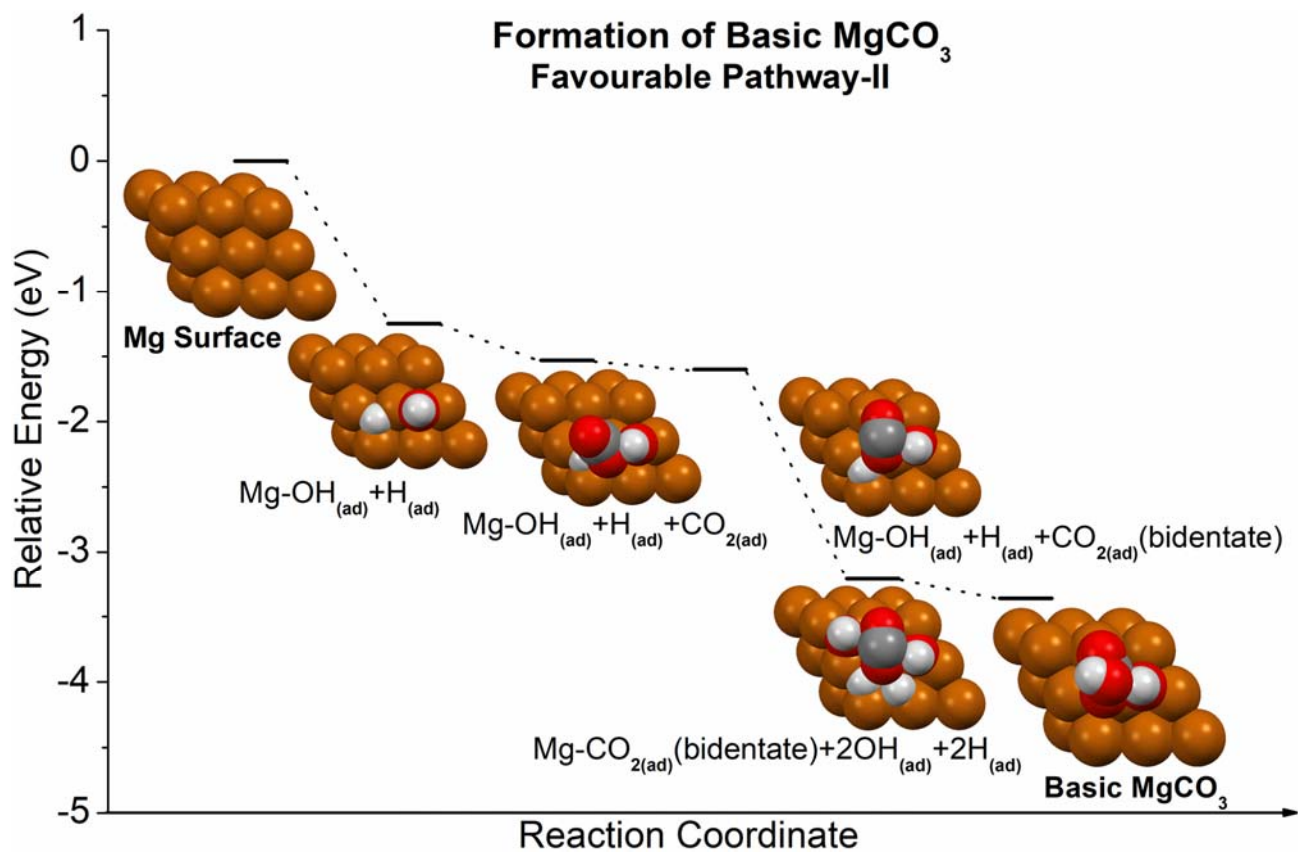

**Figure S10.** Potential energy surface of the formation of basic MgCO<sub>3</sub> via pathway-II.

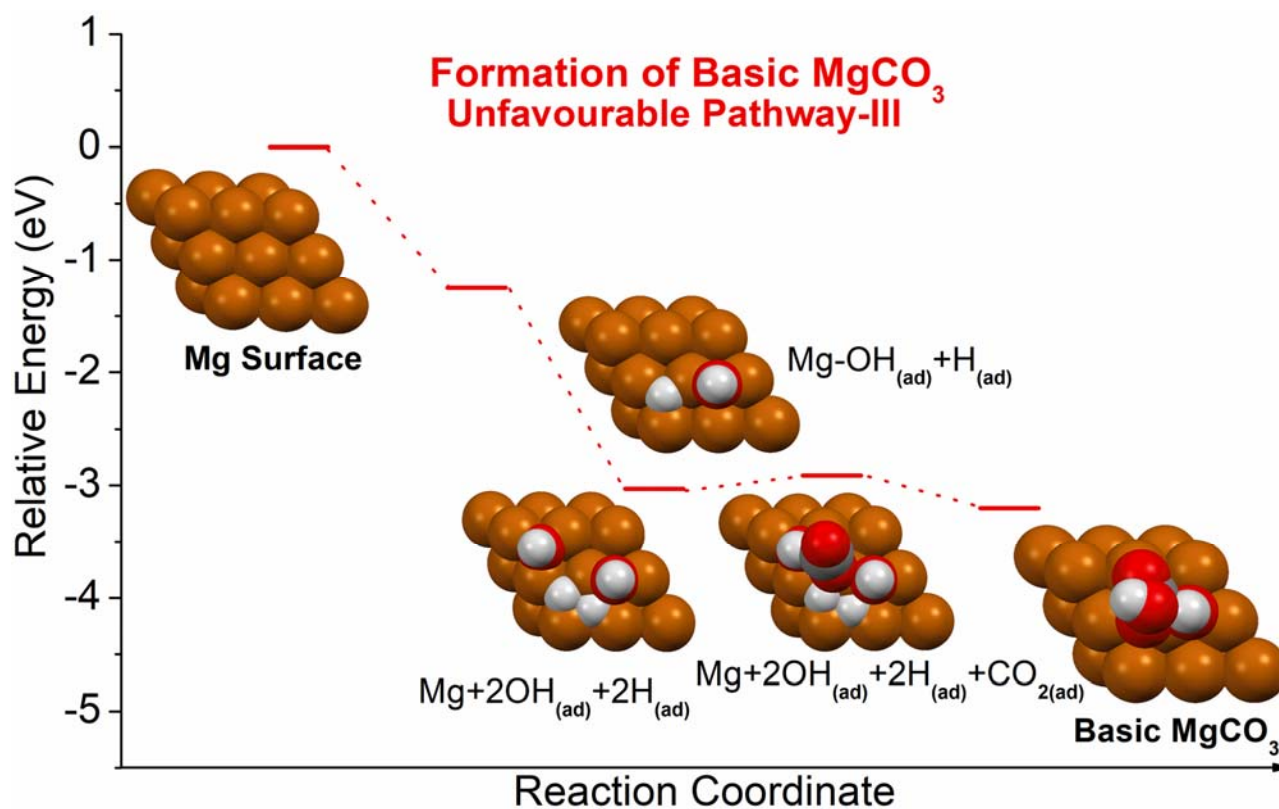

**Figure S11.** Potential energy surface of the formation of basic MgCO<sub>3</sub> via pathway-III.

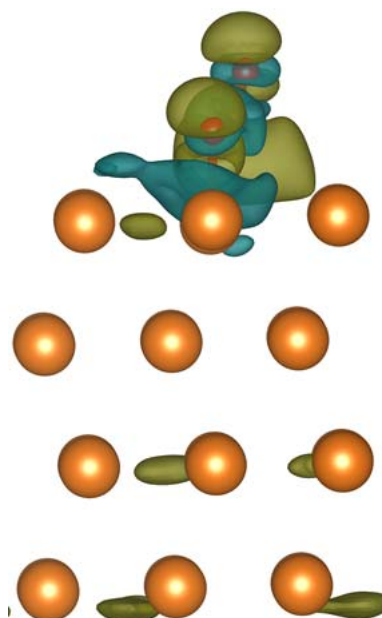

**Figure S12.** Charge density difference (CDD) plot (isodensity value at surfaces is  $\pm 0.002$  e/au<sup>3</sup> (Positive: olive and Negative: cyan)) of CO<sub>2</sub> adsorbed on the pristine Mg surface, showing charge transfer in the region between CO<sub>2</sub> and surface atoms upon adsorption of CO<sub>2</sub>.

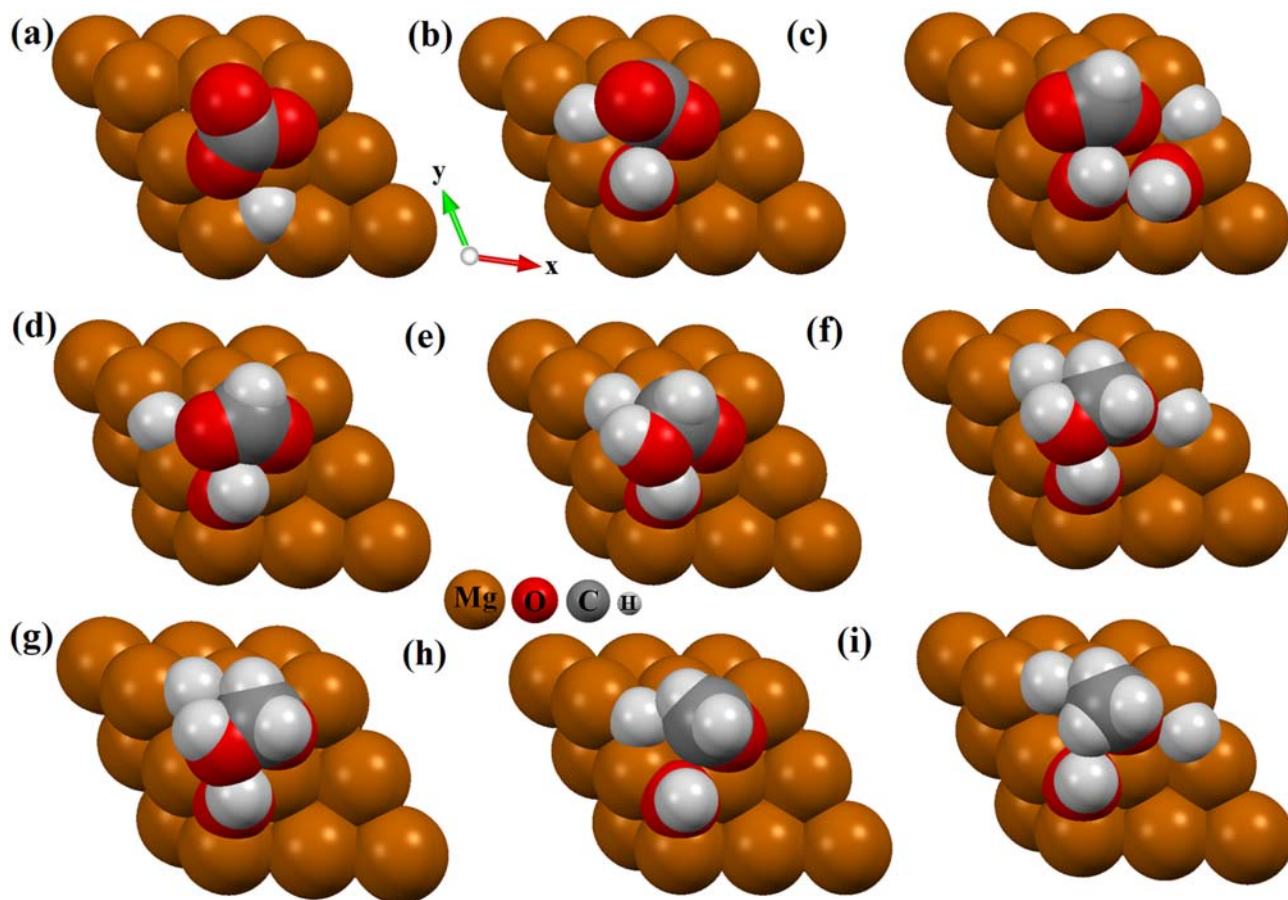

**Figure S13.** Structures of different intermediates for  $\text{CO}_2$  to  $\text{CH}_4$  formation: (a-i) represent the corresponding intermediate from intermediate A to I in figure 5.

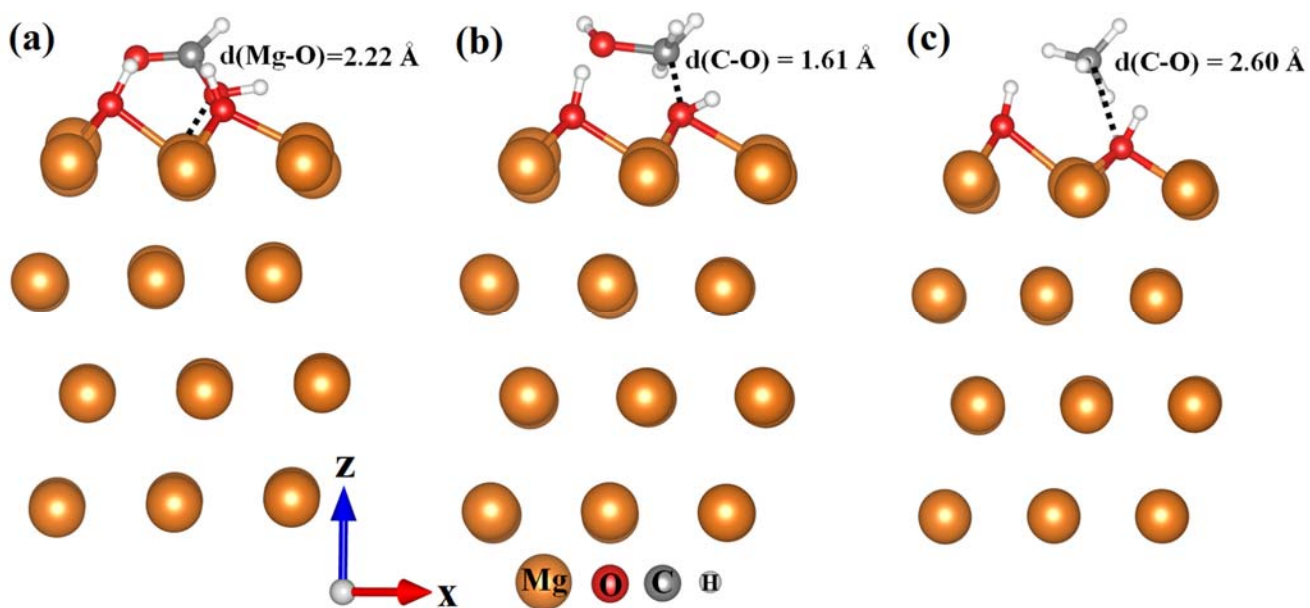

**Figure S14.** (a)  $\text{HCOOH}$ , (b)  $\text{CH}_3\text{OH}$  and (c)  $\text{CH}_4$  adsorbed on the Mg surface during  $\text{CO}_2$  reduction.

**Mg Process Sustainability:** The crucial magnesium electrolysis step to produce magnesium from  $\text{Mg}^{2+}$  requires low energy, and this process is highly efficient in industrial magnesium production from sea salts, with Faradaic efficiencies approaching 90%.<sup>1</sup> In comparison to other metals that convert  $\text{CO}_2$  to chemicals and fuels, magnesium needs the lowest energy for production. For example, Mg needs 18.8 MJ/kg for production, while metals like Au need 208.000 MJ/kg, and Rh needs 683.000 MJ/kg.<sup>2</sup> The energy required for other metals, as compared to Mg, is summarised in Fig. S16. Notably, Mg is one of the metals with the lowest energy demand for production. Magnesium electrolysis costs are further minimized by operating the process commercially at a large scale and hence the total energy required can be further reduced. Currently, Mg costs not more than 4 USD per kg.<sup>3</sup> Recently, Mg was even produced for as low as ~1 USD per kg using a solar-energy pumped laser.<sup>4</sup>

In magnesium production, no  $\text{CO}_2$  is released if the source is  $\text{MgCl}_2$  or Mg-silicates. More excitingly, the entire Mg production process has one of the lowest impacts on global warming as compared to other metal catalysts for  $\text{CO}_2$  reduction.<sup>5</sup> Magnesium produces 5.2 kg  $\text{CO}_2$  per kg Mg, while metals like gold produce 12.500 kg  $\text{CO}_2$  per kg Au, and rhodium produces 35000 kg  $\text{CO}_2$  per kg Rh.  $\text{CO}_2$  produced by other metals, as compared to Mg, is summarised in Fig. S17, indicating that Mg is one of the metals producing the lowest amount of  $\text{CO}_2$  during production.

Thus, magnesium is the 8<sup>th</sup> most abundant metal, and costs only about \$1.00 to 4.00 per kg. However, even being one of the cheapest metals, the cost of magnesium is still higher than that of the methane produced. However, the methane cost is low because currently, we get methane from natural sources. Methane is a greenhouse gas with 25 times more warming impact than  $\text{CO}_2$ , and ideally, methane should not be exposed to the environment, causing further damage. Since all the products (methane, methanol, formic acid and hydrogen) in this Mg process are produced from  $\text{CO}_2$ , it is an ideal  $\text{CO}_2$  negative process. Thus, the price of these fuels can not be directly compared with that from current conventional processes (from fossil fuel or drilling natural methane). The idea of “cyclic economy” and “net-zero-emissions energy systems” is to use excess  $\text{CO}_2$  by converting it to fuel (methane, methanol, formic acid, dimethyl ether (DME) etc) and then, after burning these fuels (to get energy), the  $\text{CO}_2$  produced will again be captured and converted to fuel. This way, no  $\text{CO}_2$  is released in the environment ( $\text{CO}_2$  neutral process) and both of our problems of energy as well as global warming get resolved.

The LCA and cost calculations are tabulated below. This process is sustainable and economical, even without Mg regeneration.

| Process                                             | Energy (+ required or - produced)                                                                                                                                     |                                              | CO <sub>2</sub> (+ released or - mitigated)                                                                                                                                                                                                          |
|-----------------------------------------------------|-----------------------------------------------------------------------------------------------------------------------------------------------------------------------|----------------------------------------------|------------------------------------------------------------------------------------------------------------------------------------------------------------------------------------------------------------------------------------------------------|
| Electrolysis of Mg <sup>2+</sup> to produce 1 Kg Mg | + 0 MJ<br>( Ideally + 18.8 MJ energy is required but was obtained from Solar Energy)                                                                                  |                                              | + 0 kg<br>(No CO <sub>2</sub> is released in the Mg production process when the source used is chloride or silicates.)                                                                                                                               |
| CO <sub>2</sub> conversion by 1 kg Mg               | No external energy was required for this reaction                                                                                                                     | 0 MJ                                         |                                                                                                                                                                                                                                                      |
|                                                     | Product- <b>Methane</b> :<br>Energy (50.1 kJ/g) released by burning 1.6 g of Methane                                                                                  | -0.0816 MJ                                   | 0.0044 kg (mitigated)<br>0.1 mol CO <sub>2</sub> converted to methane - 0.1 x 44 = 4.4 g                                                                                                                                                             |
|                                                     | Product- <b>Methanol</b> :<br>Energy (22.7 kJ/g) released by burning 0.8138 g of Methanol                                                                             | -0.0185 MJ                                   | 0.0011176 kg (mitigated)<br>0.0254 mol CO <sub>2</sub> converted to methanol -0.0254 x 44 = 1.1176 g                                                                                                                                                 |
|                                                     | Product- <b>Formic Acid</b> :<br>Energy (6.4 MJ/lit) released by burning 0.98 mL of Formic Acid                                                                       | -0.00627 MJ                                  | 0.001196kg (mitigated)<br>0.026 mol CO <sub>2</sub> converted to formic acid-0.026 x 46 = 1.196 g                                                                                                                                                    |
|                                                     | Product- <b>Hydrogen</b> :<br>Energy (0.490 MJ/kg) required to produce 0.083kg hydrogen from fossil fuel (steam reforming of methane), which is saved by this process | -0.0406 MJ                                   | - 0.76 kg (stopped from releasing to the environment)<br>9.21 kg CO <sub>2</sub> per kg H <sub>2</sub> emitted if produced from methane reforming, i.e. 0.76 kg CO <sub>2</sub> could have been emitted if H <sub>2</sub> was produced from methane. |
|                                                     | Energy (141.86 MJ/kg) released by burning 0.083 kg hydrogen                                                                                                           | -11.77 MJ                                    | 0 kg (no emission)                                                                                                                                                                                                                                   |
|                                                     | Product- <b>Mg Basic Carbonate</b> :<br>Mg basic carbonate (heat of formation of carbonate)                                                                           | -2.08 MJ                                     | - 1.44 kg (mitigated)<br>1 kg Mg produced 3.85 kg basic carbonate by reacting with 1.44 kg CO <sub>2</sub>                                                                                                                                           |
|                                                     | <b>Total</b>                                                                                                                                                          | <b>11.91 MJ</b><br><b>(Energy generated)</b> | <b>2.2 kg</b><br><b>(CO<sub>2</sub> mitigated)</b>                                                                                                                                                                                                   |



(A) Cumulative Energy Demand (MJ-eq / kg)

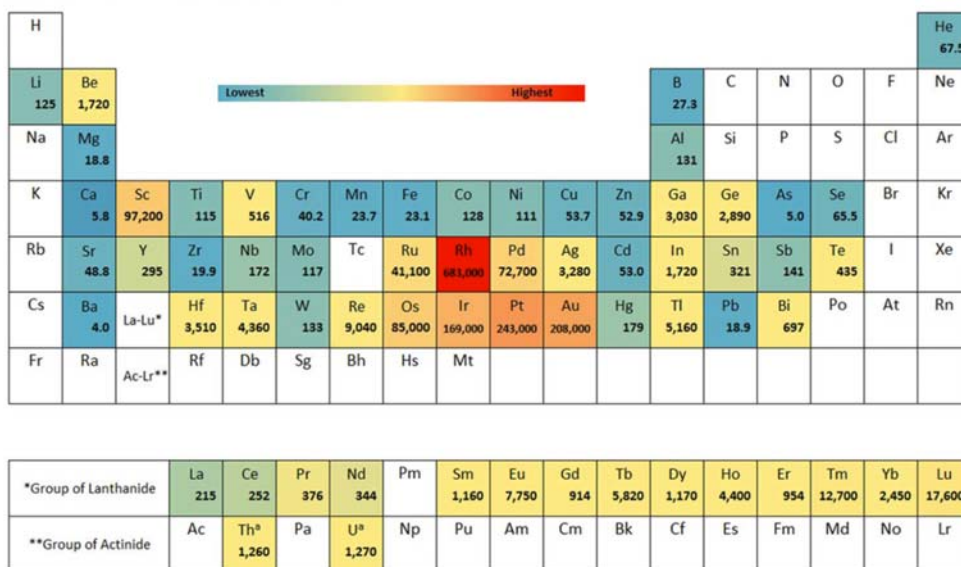

Figure S15. Cradle-to-gate cumulative energy demand (CED) (MJ-eq/kg) per kilogram of each element, including various metals used in CO<sub>2</sub> conversion. Reproduced from Ref. 5, Copyright PLOS.

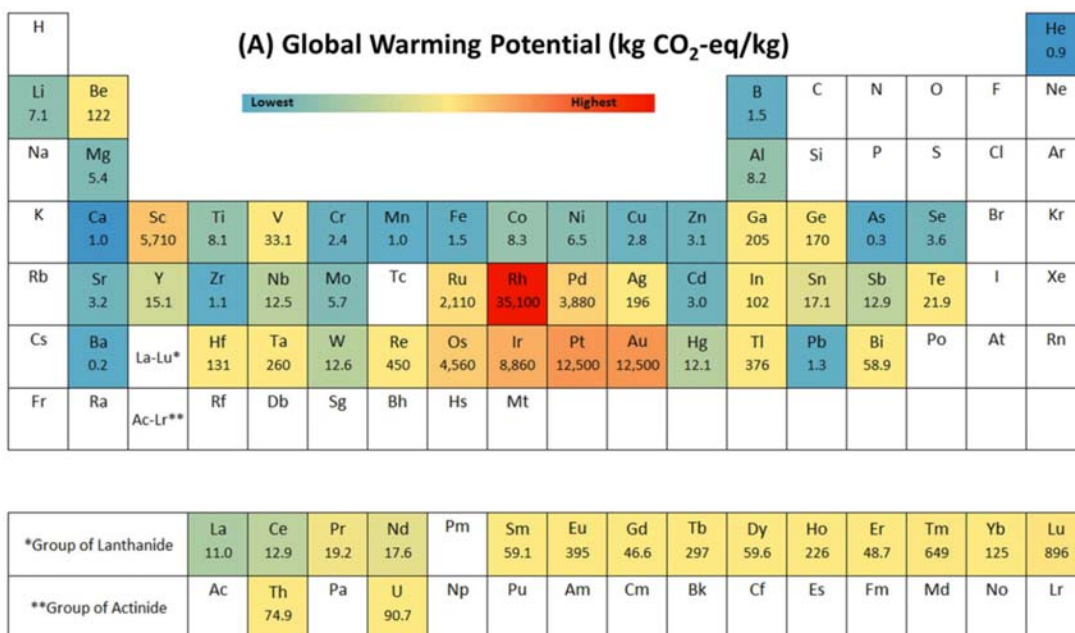

Figure S16. Global warming potential (CO<sub>2</sub> produced) per kilogram of each element, including various metals used in CO<sub>2</sub> conversion. Reproduced from Ref. 5, Copyright PLOS.



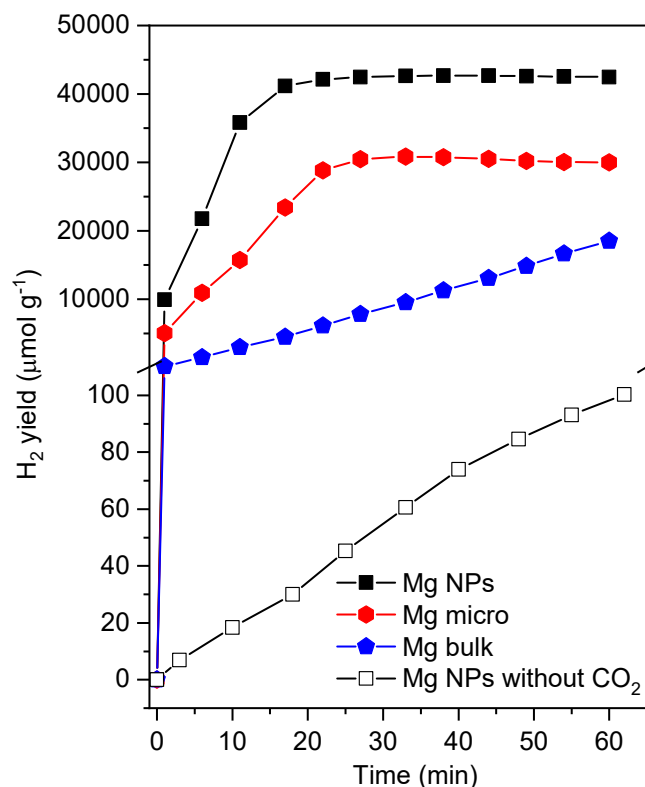

**Figure S17.** Hydrogen yield with reaction time during reduction of CO<sub>2</sub> at room temperature and ambient pressure. Notably, in the absence of CO<sub>2</sub>, Mg does not react efficiently with water and hydrogen yield was extremely low, 100 µmol g<sup>-1</sup> as compared to 42000 µmol g<sup>-1</sup> in the presence of CO<sub>2</sub>. This was due to poor solubility of magnesium hydroxide formed by reaction of Mg with water, restricting the internal Mg surface to react further with water. However, in the presence of CO<sub>2</sub>, magnesium hydroxide gets converted to carbonates and basic carbonates, which are more soluble in water than magnesium hydroxide and gets peeled off from Mg, exposing fresh Mg surface to react with water. Thus, this protocol can even be used for hydrogen production (940 mL g<sup>-1</sup>), which is nearly 420 times more than hydrogen produced by the reaction of Mg with water alone (2.24 mL g<sup>-1</sup>).

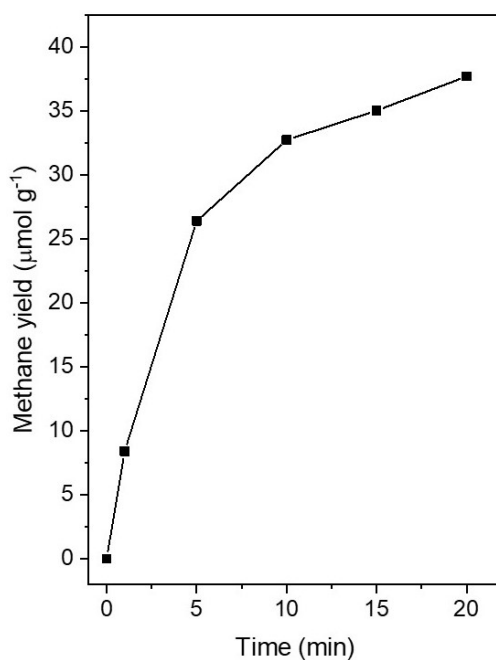

**Figure S18.** Methane yield with reaction time, for reduction of CO<sub>2</sub> in water using Mg NPs, at – 1 to +1 °C at atmospheric pressure.

**Table S1.** Elemental analysis of Mg NPs by SEM-EDX

| Sample | Mg (wt%) | O (wt%)* |
|--------|----------|----------|
| Mg NPs | 80.06    | 19.94    |

\* SEM-EDX is surface elemental techniques, indicating the presence of MgO layer on Mg NPs surface.

**Table S2.** Methanol, formic acid, and methane yield (normalized by Mg contents) for reduction of CO<sub>2</sub> using water at room temperature and atmospheric pressure in 1 h.

| Sample Name        | Composition of sample                 | Composition (wt. %) |       | CH <sub>4</sub> | Formic acid  | Methanol     |
|--------------------|---------------------------------------|---------------------|-------|-----------------|--------------|--------------|
|                    |                                       | Mg                  | Metal | μmol/g of Mg    | μmol/g of Mg | μmol/g of Mg |
| Mg <sub>2</sub> Ni | Mg <sub>2</sub> Ni                    | 80                  | 20    | 107             | 32           | 30           |
| MgCa               | Ca <sub>0.06</sub> Mg <sub>0.93</sub> | 90                  | 10    | 59              | 24           | 31           |
| MgAl               | Al <sub>0.6</sub> Mg <sub>0.4</sub>   | 62                  | 38    | 87              | 35           | 34           |
| Mg NPs             | Mg                                    | 100                 | 0     | 96              | 26           | 25           |
| Mg bulk            | Mg                                    | 100                 | 0     | 16              | 15           | 17           |
| Mg micro           | Mg                                    | 100                 | 0     | 78              | 23           | 31           |
| MgH <sub>2</sub>   | MgH <sub>2</sub>                      | 100                 | 0     | 0               | 4            | 3            |

**Table S3.** Contribution from different carbons with respect to the adventitious carbon at different time intervals.

| Sample       | Ratio of different species with respect to adventitious carbon |       |                        |                                            |
|--------------|----------------------------------------------------------------|-------|------------------------|--------------------------------------------|
|              | OCH <sub>3</sub>                                               | C-O   | Carbonyl species (C=O) | Carbonate (CO <sub>3</sub> <sup>2-</sup> ) |
| Mg NPs       | 0                                                              | 0.095 | 0.265                  | 0.475                                      |
| After 1 min  | 0.676                                                          | 0     | 0.484                  | 0.676                                      |
| After 5 min  | 0.627                                                          | 0     | 0.671                  | 0.629                                      |
| After 15 min | 0.552                                                          | 0     | 0.613                  | 0.975                                      |

**Table S4.** Analysis of CO<sub>2</sub> activation via different proposed pathways.

| Pathways | C-O bond length (Å) |      | OCO bond angle (°) | Charge transferred (Mg to CO <sub>2</sub> ) Δq (e) | CO <sub>2</sub> Binding Energy (eV) |
|----------|---------------------|------|--------------------|----------------------------------------------------|-------------------------------------|
| I        | 1.22                | 1.19 | 140.80             | 0.17                                               | -0.31                               |
| II       | 1.21                | 1.18 | 145.12             | 0.15                                               | -0.28                               |
| III      | 1.19                | 1.17 | 155.34             | 0.11                                               | 0.42                                |

**Table S5.** Different parameters of Mg surface adsorbed HCOOH, CH<sub>3</sub>OH and CH<sub>4</sub> species.

| Adsorbed Species   | Observed distance (Å) | bonding distance (Å) | Reaction Energy (eV) |
|--------------------|-----------------------|----------------------|----------------------|
| HCOOH              | d(Mg-O) = 2.22        | 2.10                 | -0.26                |
| CH <sub>3</sub> OH | d(C-O) = 1.61         | 1.43                 | -0.32                |
| CH <sub>4</sub>    | d(C-O) = 2.60         | 1.43                 | -0.68                |

**Table S6.** Methane production cost-comparison of Mg mediated process with various reported room temperature CO<sub>2</sub> conversion protocols.

| S. No | Metal (energy)                                  | Methane Yield             | Price of Metal | Methane Yield (per USD) | References |
|-------|-------------------------------------------------|---------------------------|----------------|-------------------------|------------|
| 1     | Mg NPs (No external energy)                     | 100 μmol g <sup>-1</sup>  | 1\$ per Kg     | 100000 μmol/\$          | This work  |
| 2     | Au NPs (visible light)                          | 0.63 μmol g <sup>-1</sup> | 45\$ per g     | 0.014 μmol/\$           | 6          |
| 3     | Au Colloidosomes (visible light)                | 1.5 μmol g <sup>-1</sup>  | 45\$ per g     | 0.033 μmol/\$           | 7          |
| 4     | Pd <sub>7</sub> Cu <sub>1</sub> (visible light) | 19.6 μmol g <sup>-1</sup> | 50\$ per g     | 0.392 μmol/\$           | 8          |
| 5     | Au-Co (visible light)                           | 0.13 μmol g <sup>-1</sup> | 45\$ per g     | 0.0029 μmol/\$          | 9          |

## References:

1. Polmear, I. J. *Magnesium and Magnesium Alloys*, Eds. M. M. Avedesian and H. Baker (ASM International, OH, USA, 1999, 3–6).
2. Nuss, P., Eckelman, M. J. Life Cycle Assessment of Metals: A Scientific Synthesis, *PLoS ONE* **9**, e101298 (2014).
3. Demirci, G., Karakaya, I. *Magnesium Technology 2012*, Eds. Mathaudhu, S. N., Sillekens, W. H., Neelameggham, N. R., Hort N. (John Wiley & Sons, Hoboken, NJ, USA, 2012, 59–62).
4. Kostanyan R. K. Use of magnesium as renewable energy source. *Int. J. Chem. Mol. Eng.* **11**, 416-421 (2017).
5. Nuss, P., Eckelman, M. J. Life Cycle Assessment of Metals: A Scientific Synthesis. *PLoS ONE* **9**, e101298 (2014).
6. Yu, S., Wilson, A. J., Heo, J. Jain, P. K. Plasmonic control of multi-electron transfer and C-C coupling in visible-light-driven CO<sub>2</sub> reduction on Au nanoparticles. *Nano Lett.* **18**, 2189-2194 (2018).
7. Dhiman, M., Maity, A., Das, A., Belgamwar, R., Chalke, B., Lee, Y., Sim, K., Jwa-Min Nam, J.-W., Polshettiwar, V. Plasmonic colloidosomes of black gold for solar energy harvesting and hotspots directed catalysis for CO<sub>2</sub> to fuel conversion. *Chem. Sci.* **10**, 6694-6603 (2019).
8. Long, R., Li, Y., Liu, Y., Chen, S., Zheng, X., Gao, C., He, C., Chen, N., Qi, Z., Song, L., Jiang, J., Zhu, J., Xiong, Y. Isolation of Cu atoms in Pd lattice: forming highly selective sites for photocatalytic conversion of CO<sub>2</sub> to CH<sub>4</sub>. *J. Am. Chem. Soc.* **139**, 4486–4492 (2017).
9. Cui, X., Wang, J., Liu, B., Ling, S., Long, R., Xiong, Y., Turning Au nanoclusters catalytically active for visible-light-driven CO<sub>2</sub> reduction through bridging ligands. *J. Am. Chem. Soc.* **140**, 16514-16520 (2018).
